# Supplementary material for: Low-dose versus standard-dose bacille Calmette–Guérin for non-muscle-invasive bladder cancer: Systematic review and meta-analysis of randomized controlled trials
Source: PubMed Central journal article supplement — Investig Clin Urol. 2022 Feb 9;63(2):140–50. doi: 10.4111/icu.20210340 (PMC8902423; doi:10.4111/icu.20210340), 2022-02-09
Supplement: icu-63-140-s003.pdf [file icu-63-140-s003.pdf]

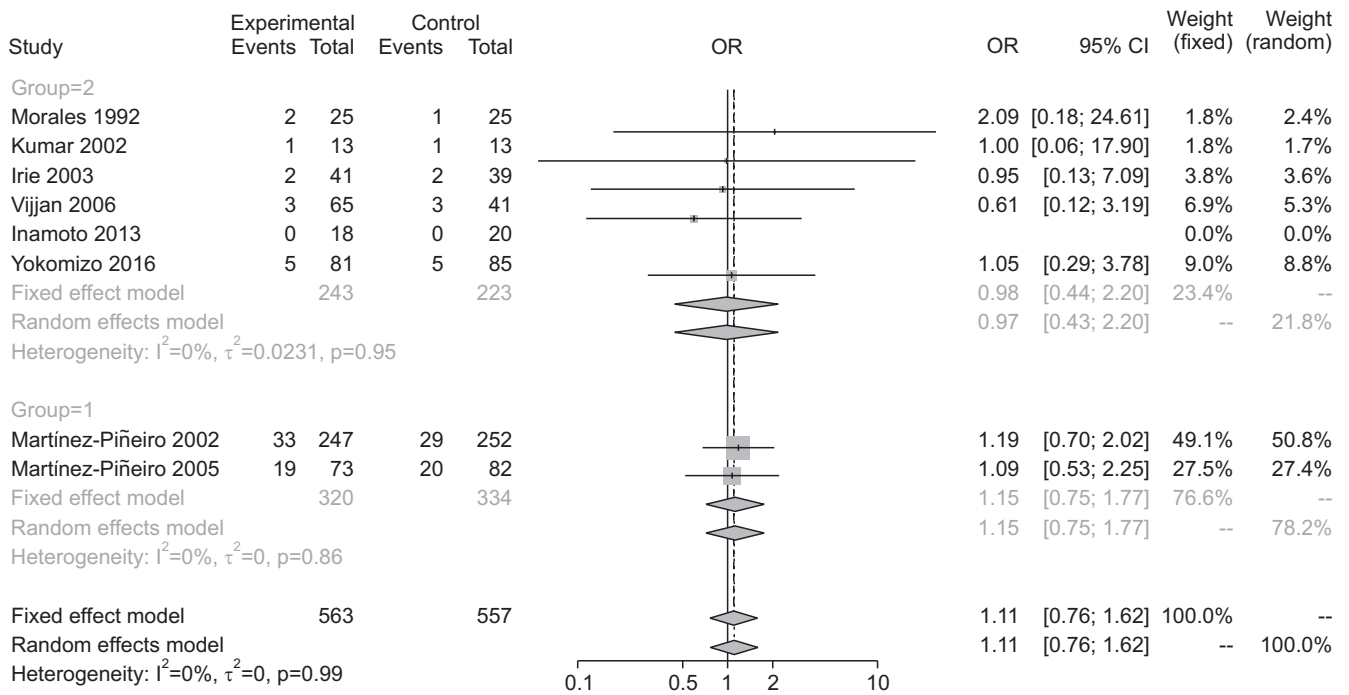

**Supplementary Fig. 3.** Forest plots of tumor progression according to subgroup analysis of bacille Calmette–Guérin instillation number.
